# Supplementary material for: Cloud mask algorithm from the EarthCARE multi-spectral imager: the M-CM products
Source: Copernicus journal article supplement (doi:10.5194/egusphere-2022-1240), 2022-11-25
Supplement: Supplementary file [file egusphere-2022-1240-AC1-supplement.pdf]

## Reply to Anonymous Referee #1

We would like to thank Anonymous Referee #1 for their helpful comments. Below are the original comments in normal with our responses in *italic* text.

### Comments to the author:

In the study “Cloud mask algorithm from the EarthCARE multi-spectral imager: the M-CM products” by Hünnerbein et al. the MSI cloud mask algorithm is described and its performance compared to selected test scenes of the EarthCARE simulator. A first validation shows a good agreement of the M-CM algorithm with 45 MODIS scenes as well as 12 MSG SEVIRI cloud mask algorithms of one selected scene. A description and first tests of the M-CM algorithm is very valuable for the cloud community and on time before the launch of EarthCARE that will provide simultaneous measurements of clouds and aerosol properties as well as radiation fluxes. The paper is written in a clear and concise way. Some minor deficits are noted in the abstract and conveyed messages of the paper. It is recommended for publication after minor revisions.

### Minor comments:

The abstract needs modification as the study’s purpose is not clearly stated. What is the study’s motivation, goal, result and outlook?

*Thanks, the abstract has been adjusted to:*

*“The EarthCARE satellite mission will provide new insights into aerosol-cloud and radiation interactions by means of synergistic observations of the Earth’s atmosphere from a collection of active and passive remote sensing instruments, flying on a single satellite platform. The Multi-Spectral Imager (MSI) will provide visible and infrared images in the cross-track direction with a 150 km swath and a pixel sampling at 500 m. The suite of MSI cloud algorithms will deliver cloud macro- and microphysical properties complementary to the vertical profiles measured from the ATmospheric LIDar (ATLID) and the Cloud Profiling Radar (CPR) instruments. This paper provides an overview of the MSI cloud mask algorithm (M-CM) being developed to derive the cloud flag, cloud phase and cloud type products, which are essential parameters for the cloud optical and physical properties (M-COP) as well as for the aerosol optical properties (M-AOT). The MSI cloud mask algorithm has been applied to simulated test data from the EarthCARE end-to-end simulator and satellite data from the Moderate Resolution Imaging Spectroradiometer (MODIS) as well as from the Spinning Enhanced Visible Infra-Red Imager (SEVIRI). Verification of the MSI cloud mask algorithm to the simulated test data and the sophisticated cloud products from SEVIRI and MODIS demonstrates a good performance of the algorithm. Some discrepancies are found however, for the detection of thin cirrus clouds over bright surfaces like desert or snow. This will be improved by tuning of the thresholds once real observations are available.”*

From my perspective a description of the M-CM algorithm is provided together with a first validation. The terms “validation” and “verification” should not be used interchangeably as they describe different things. Verification determines if the algorithm developed is suited to the specified requirements. This can be done by testing selected scenes. However, a profound validation should contain a quantitative analysis of a larger and well suited test data set that will follow after the launch as explained in the conclusion. Please check and correct the appropriate usage of these terms throughout the manuscript.

*Thanks, we agree and changed "validation" to "verification" in the paper mostly in chapter 3. The subtitles have been adjusted.*

I.14 Comma is missing after "However". Please check this throughout the manuscript.

*Done.*

I.34 "a a decision tree". Delete "a"

*Done.*

I.122 "makes no sense" Please be more specific. Why does it make no sense? Is a probability more useful for the user's applications as it provides a confidence measure or is there another reason? Please rephrase I.121-124 for clarity.

*We rephrased it to:*

*"The thresholds rely on the assumption that spectral signatures of cloud-free pixels and pixels covered by different cloud types differ. As the thresholds vary globally only the upper (cloudy) and lower (cloud-free) limits of the thresholds are defined and a linear function is used to determine the probability of how close the observation is to the limits. Furthermore, the probability of being cloud-free from the applied tests is combined to an overall probability which may provide, in combination with the number of applied tests a measure of the confidence of the result. From the overall probability a binary cloud mask indicating if a pixel is cloudy or not is derived with four levels of confidence: clear, probably clear, probably cloudy and cloudy."*

I.130 How are these surface dependent thresholds derived?

*The surface dependent thresholds (surface like: ocean, land, desert, snow, ice) are defined before and provided in the configuration data of the M-CLD processor. This allows adaptations of the thresholds at a later stage without changing the processor software.*

I.180 Please rephrase the sentence for clarity. Is the following correct?

*Thanks, we have taken your suggestion:*

*The same applies for the tri-spectral brightness temperature difference test. Further investigation is needed to define the base threshold, which is strongly dependent on surface and water vapor.*

I.190 "probabilities that the pixel is clear" --> probabilities of a pixel being clear

*Done.*

I.237 "the the" --> that the

*Done.*

I. 269 "synthetic atmospheric test scenes created with" atmospheric test scenes created synthetically with ...

*Done.*

Fig. 6 Figure subtitle >0.1 disagrees with caption and text ( $\geq 0.1$ )

*Thanks, the subtitle of the Fig 6 has been corrected.*

I. 303 "difference" is not true. The term "confusion matrix" would be more appropriate.

*Replaced.*

I. 307 "while the true cloud flag". This may be misleading as the 3D simulations are not ground truth and are highly dependent on the assumptions (I. 276). Might be better to use the word test or simulated cloud flag instead.

*We revised the formulation and found that the term model output is already misleading. As we use the 3D model fields not "the output". The extinction profiles are the 3D model fields, which build the base for the simulation of the synthetic test scenes. Therefore, we changed "output" to "input fields" and "true" to "reference".*

I. 315 "data form the Copernicus" → data from the Copernicus

*Done.*

I. 351 "Twelve groups" what is meant by this? Where do the 12 algorithms originate from?

*The 12 algorithms are different scientific institutions, like EUMETSAT central facility, the Nowcasting SAF and the Climate Monitoring SAF.*

*We changed the phrase to: "Different scientific institutions (e.g., EUMETSAT central facility, the Nowcasting SAF and the Climate Monitoring SAF) provided cloud mask data for the SEVIRI disk for the intercomparison study."*
